# Supplementary material for: Rethinking on Cultural Sustainability in Architecture: A Reading on Projects of Behruz &Ccedil;inici
Source: Preprints.org preprint supplement (doi:10.20944/preprints201810.0403.v1), 2018-10-18
Supplement: Supplementary file 25 [file supplementary]

toprak  
su təcridi  
ısı təcridi  
b. armə plək  
560  
520

brüt beton  
brüt tuğla korniş

190

260  
260

3  
3

±0.00  
±0.00

7  
-260

1  
270

a-a kesiti

toprak  
su tecridi  
ısı tecridi  
b. armø plak

brüt beton  
brüt tuğla korniş

3

341

7-260

T

260

 $\pm 0.00$ 

150

-270

$$\frac{.150}{1}$$
