# Supplementary figures and images for: Rethinking on Cultural Sustainability in Architecture: A Reading on Projects of Behruz &Ccedil;inici
Source: Preprints.org preprint supplement (doi:10.20944/preprints201810.0403.v1), 2018-10-18

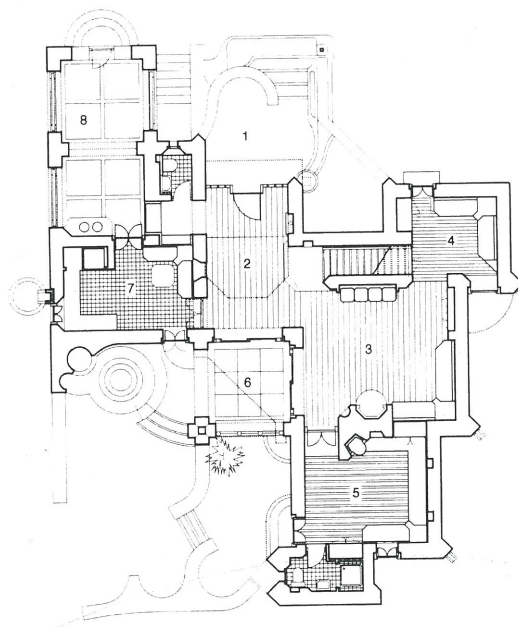

Supplement: Supplementary file 2 [file supplementary]

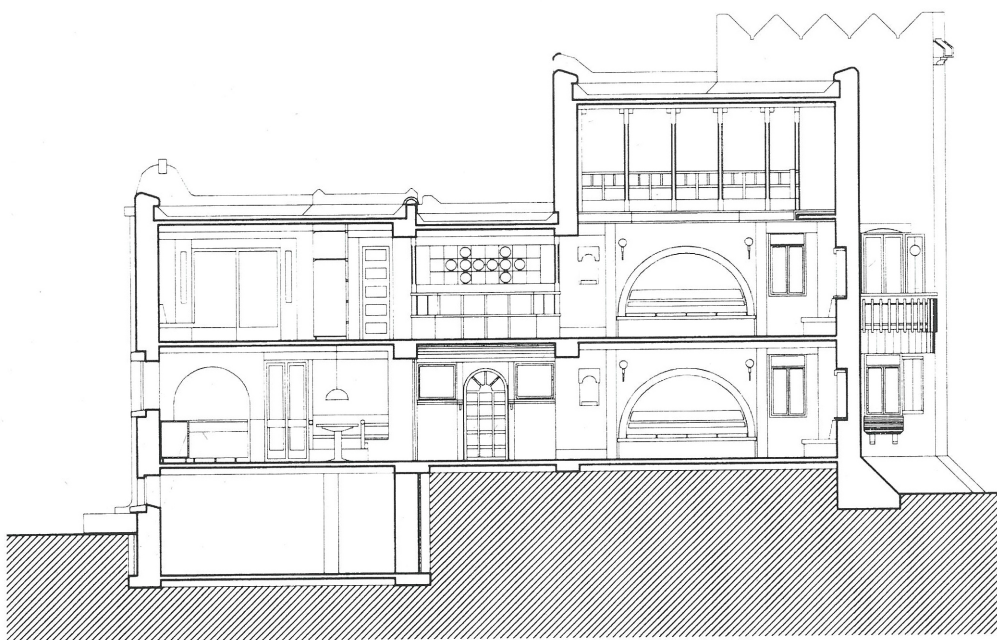

Supplement: Supplementary file 4 [file supplementary]

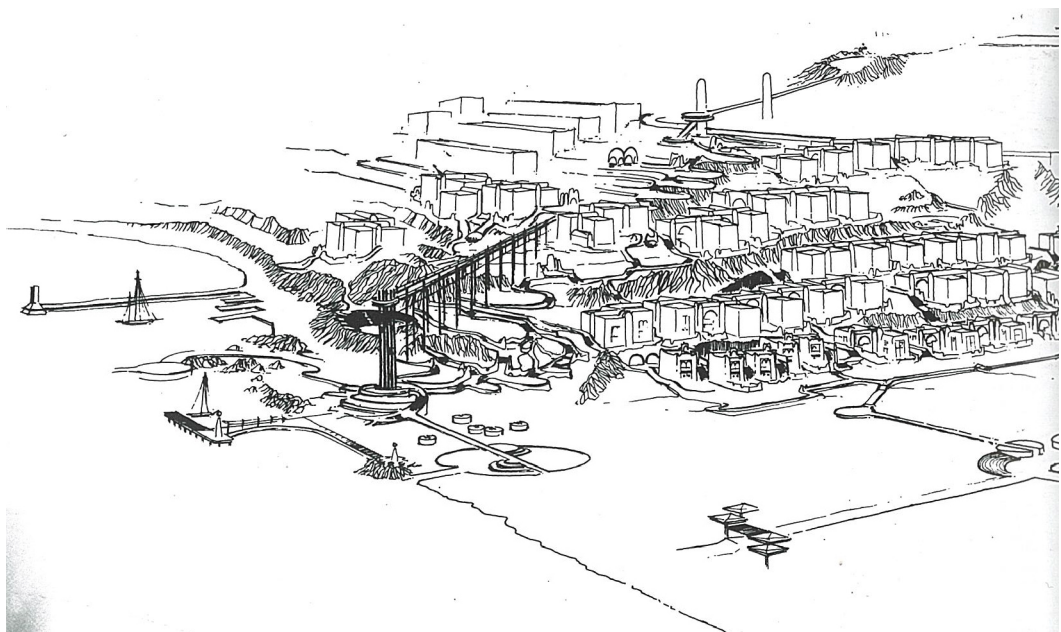

Supplement: Supplementary file 5 [file supplementary]

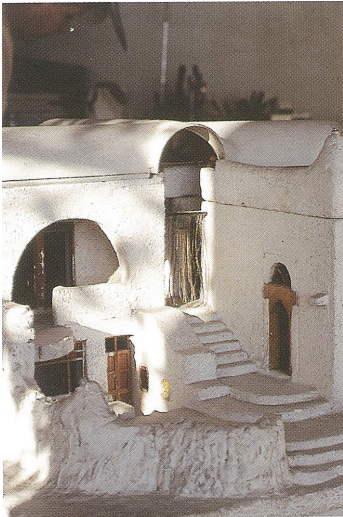

Supplement: Supplementary file 6 [file supplementary]

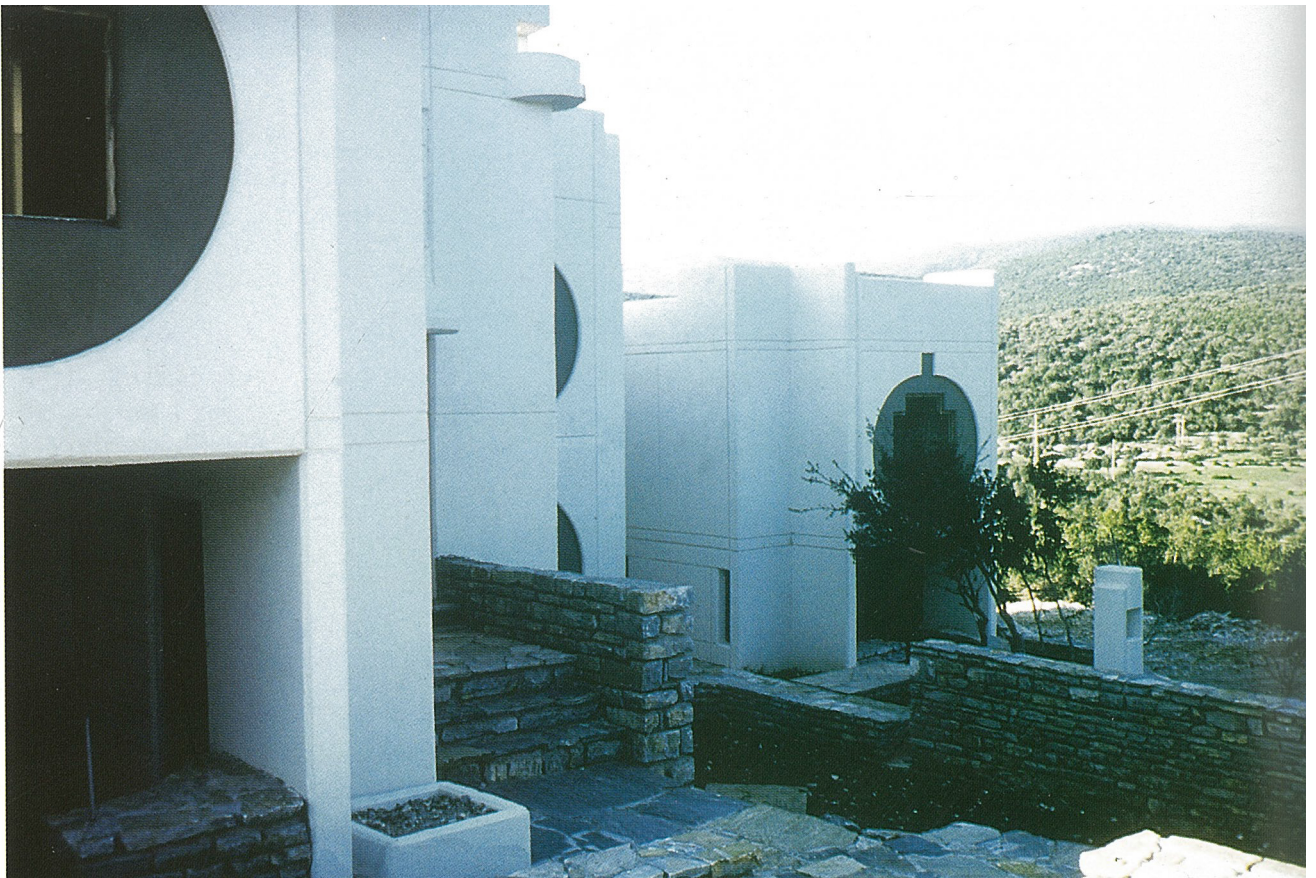

Supplement: Supplementary file 9 [file supplementary]

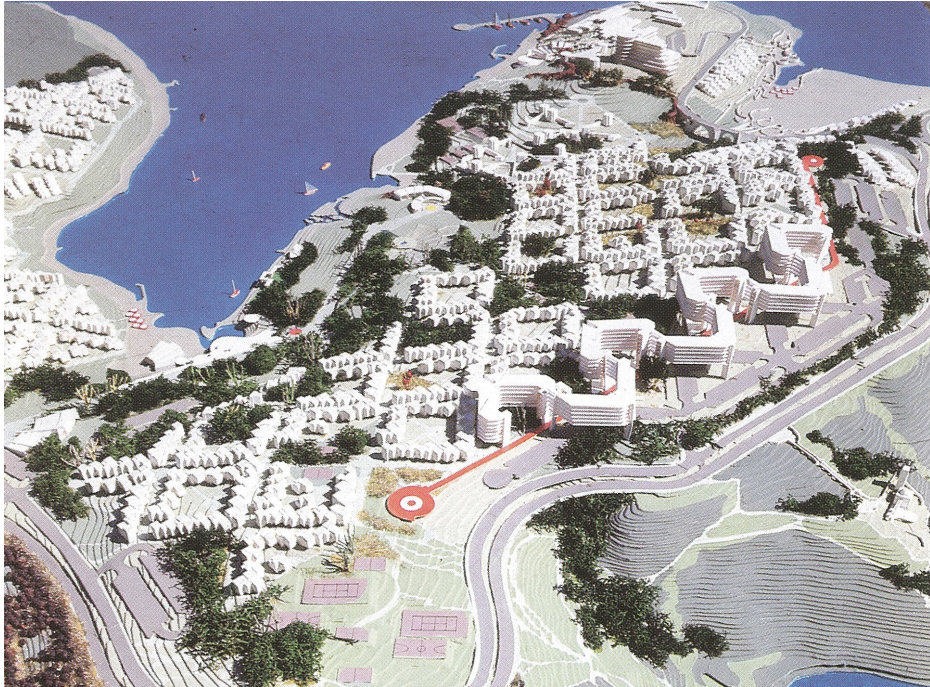

Supplement: Supplementary file 13 [file supplementary]

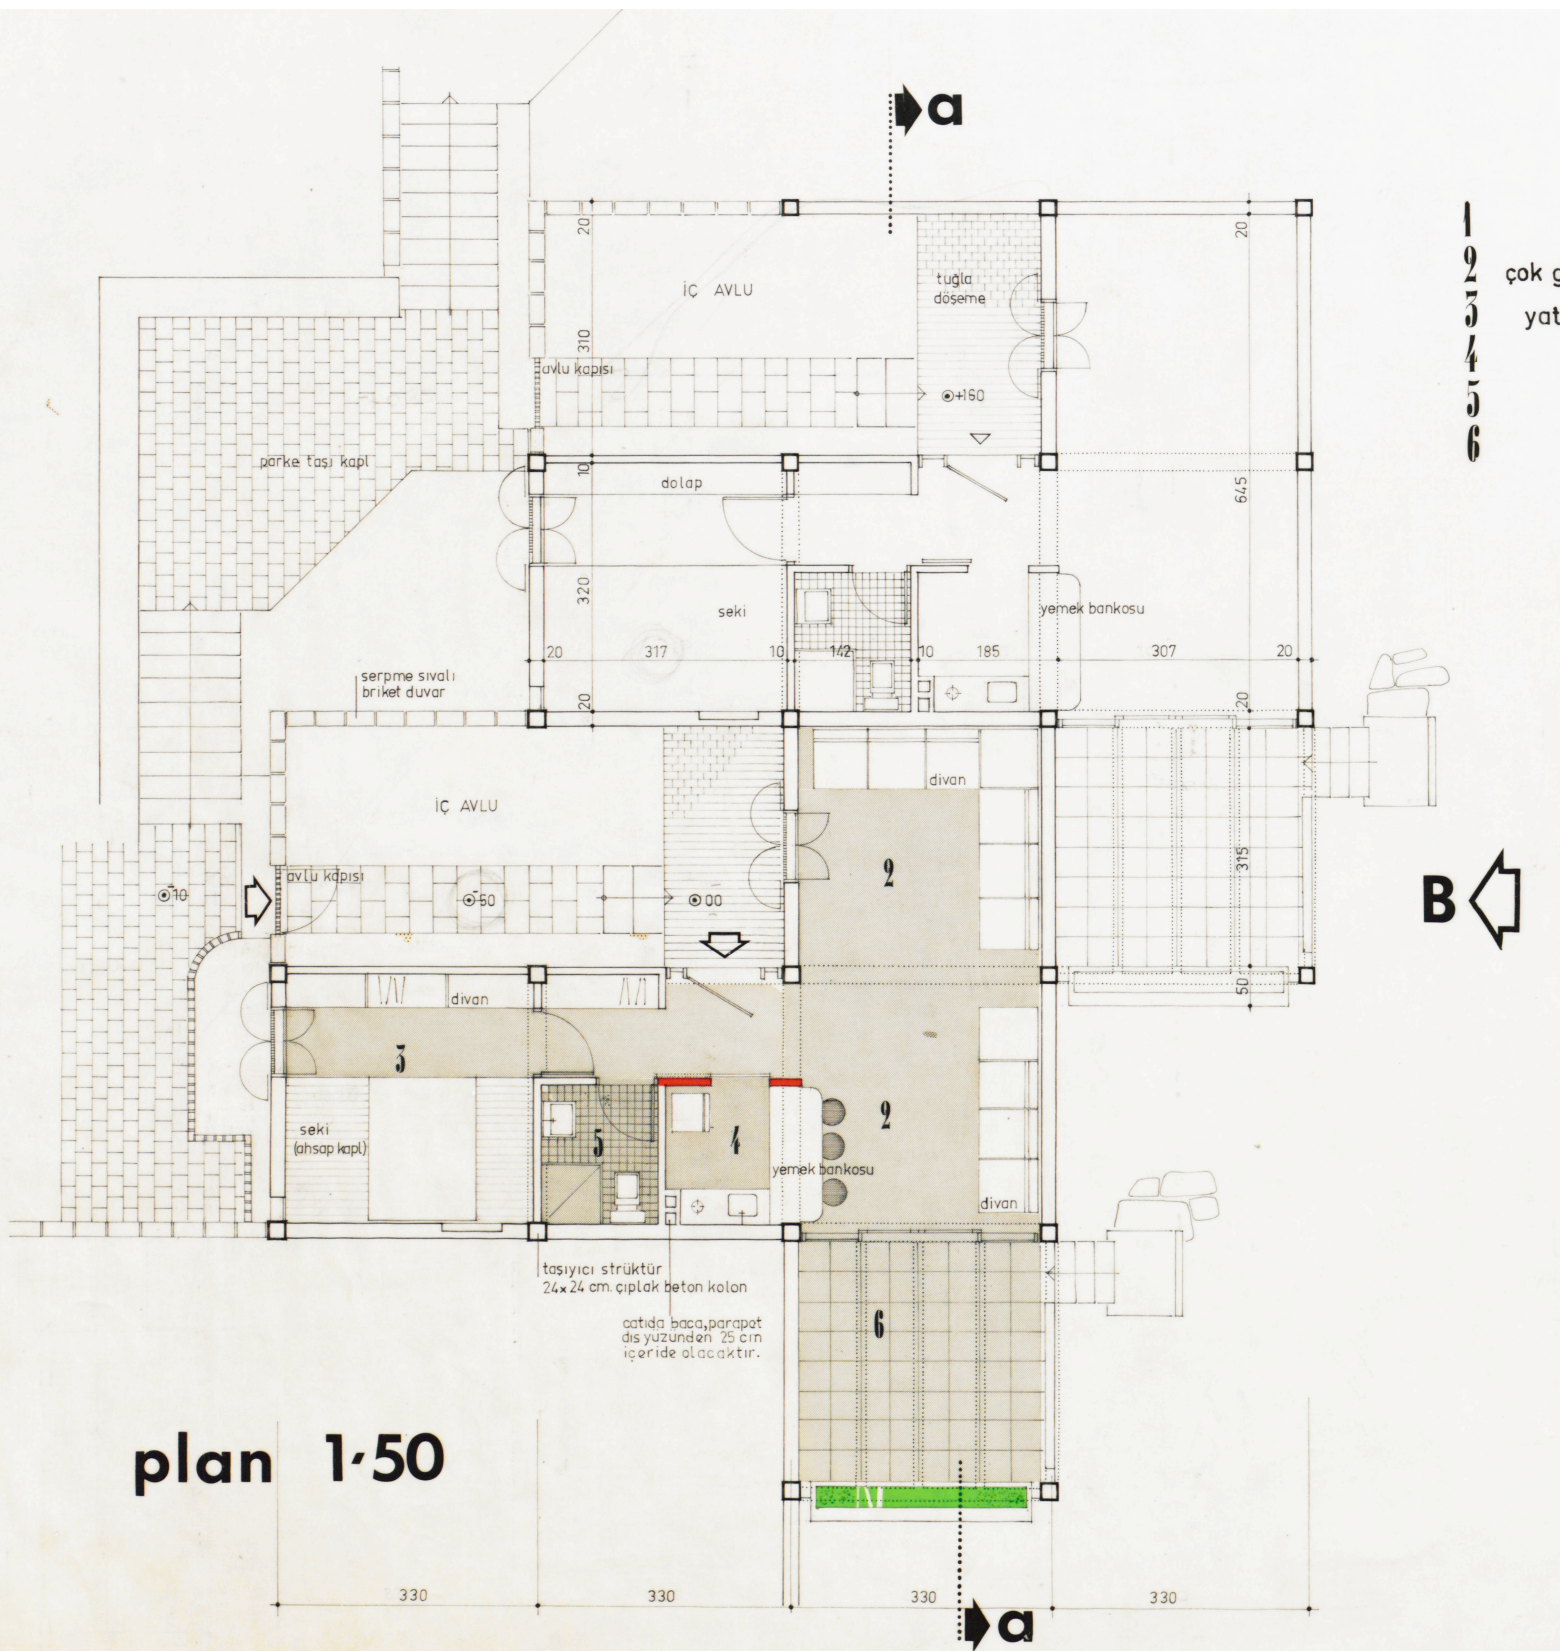

Supplement: Supplementary file 14 [file supplementary]

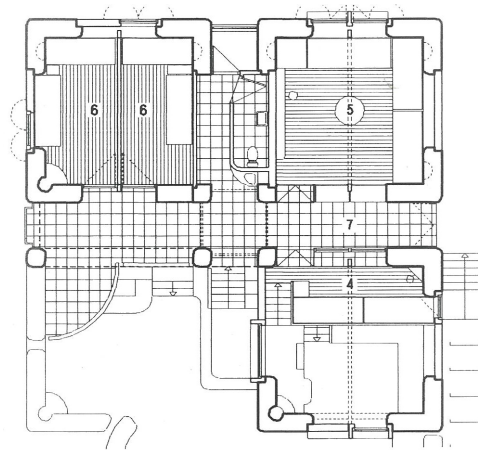

Supplement: Supplementary file 15 [file supplementary]

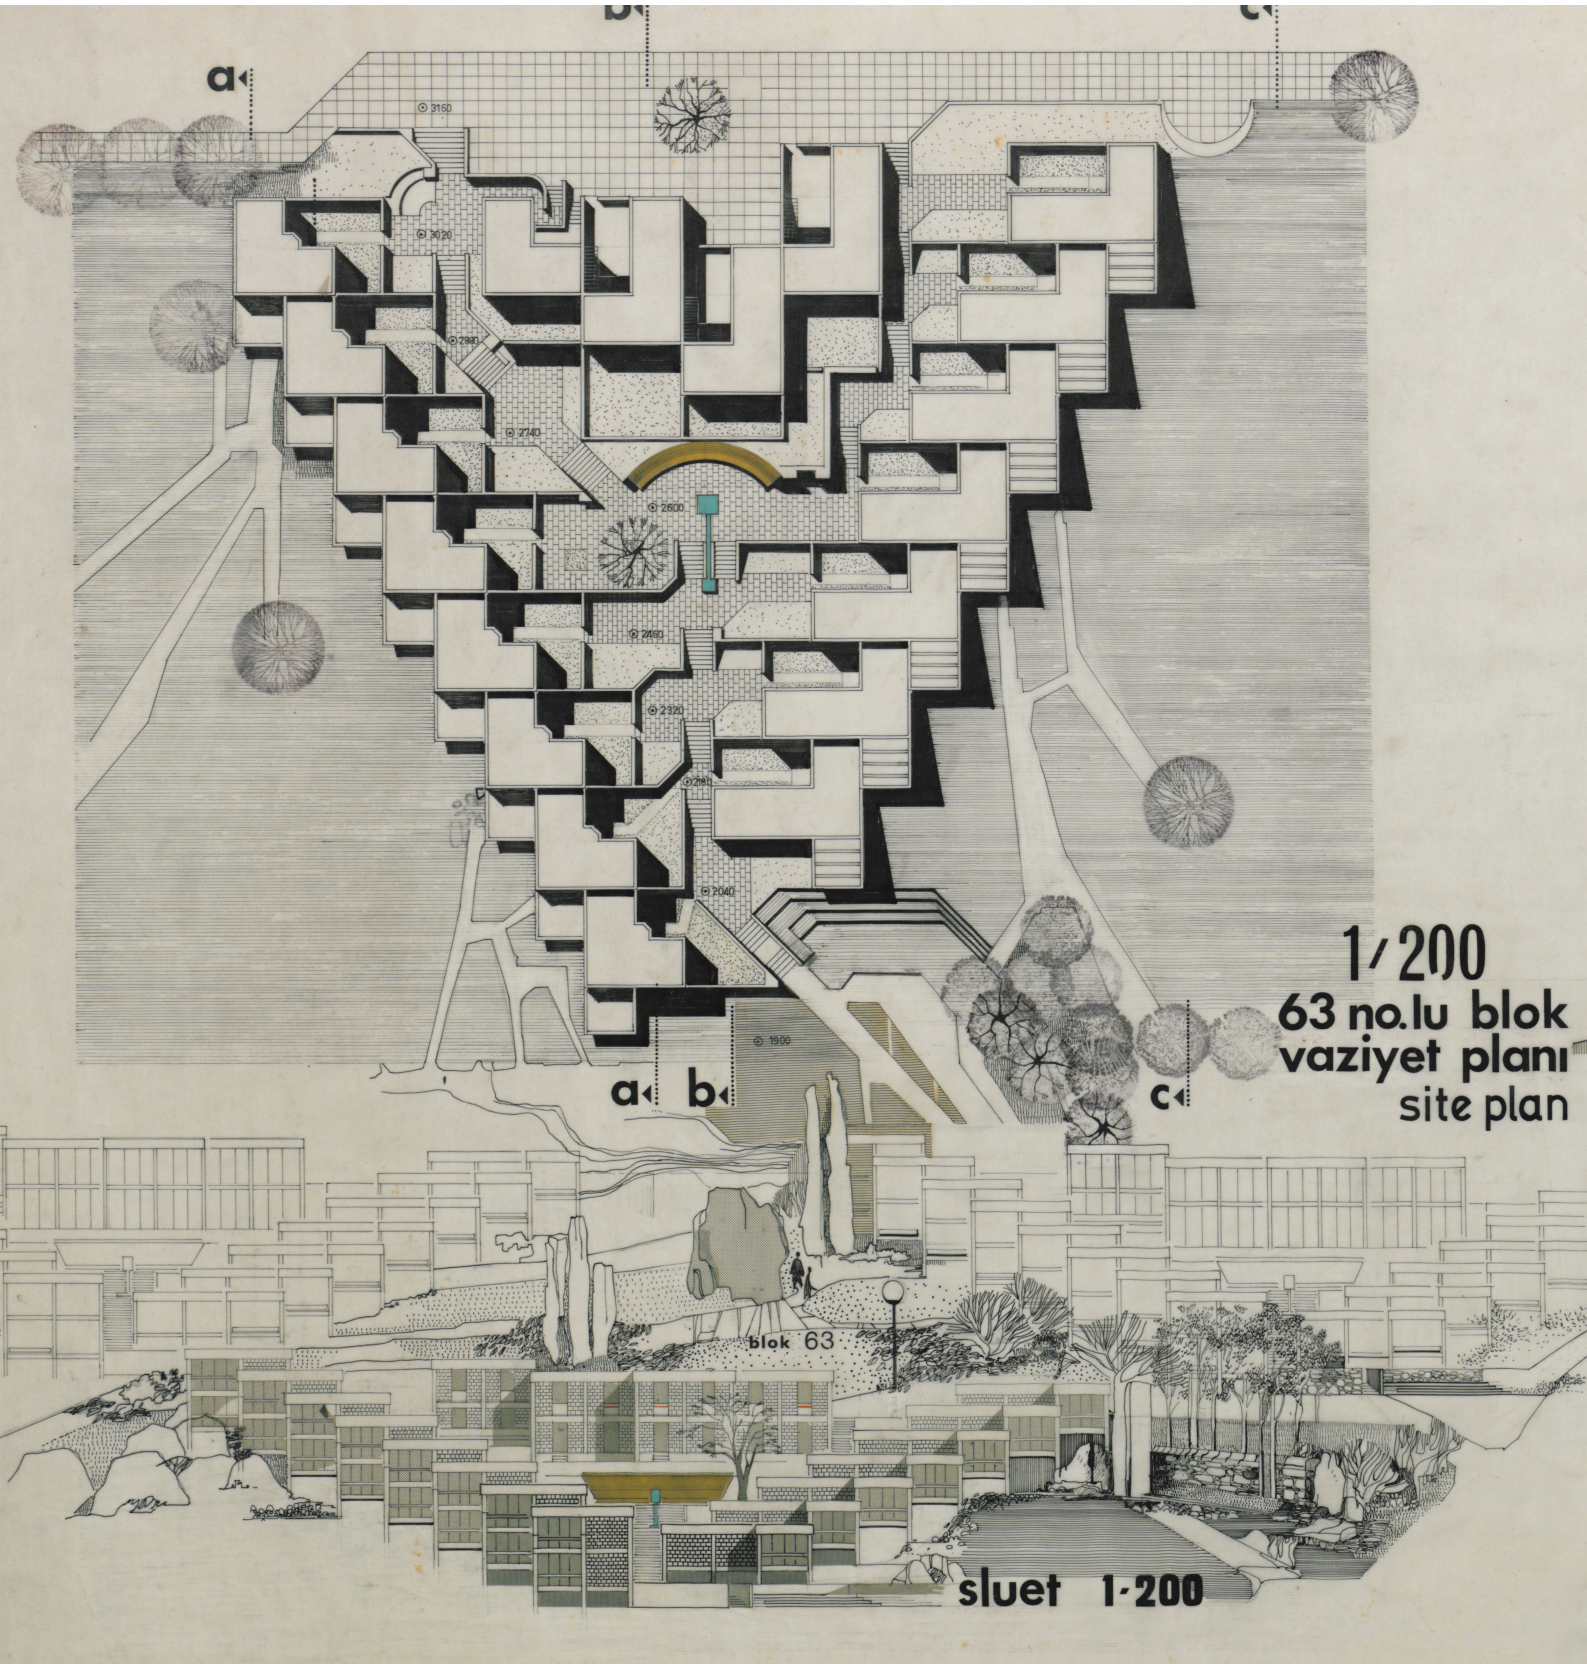

Supplement: Supplementary file 17 [file supplementary]

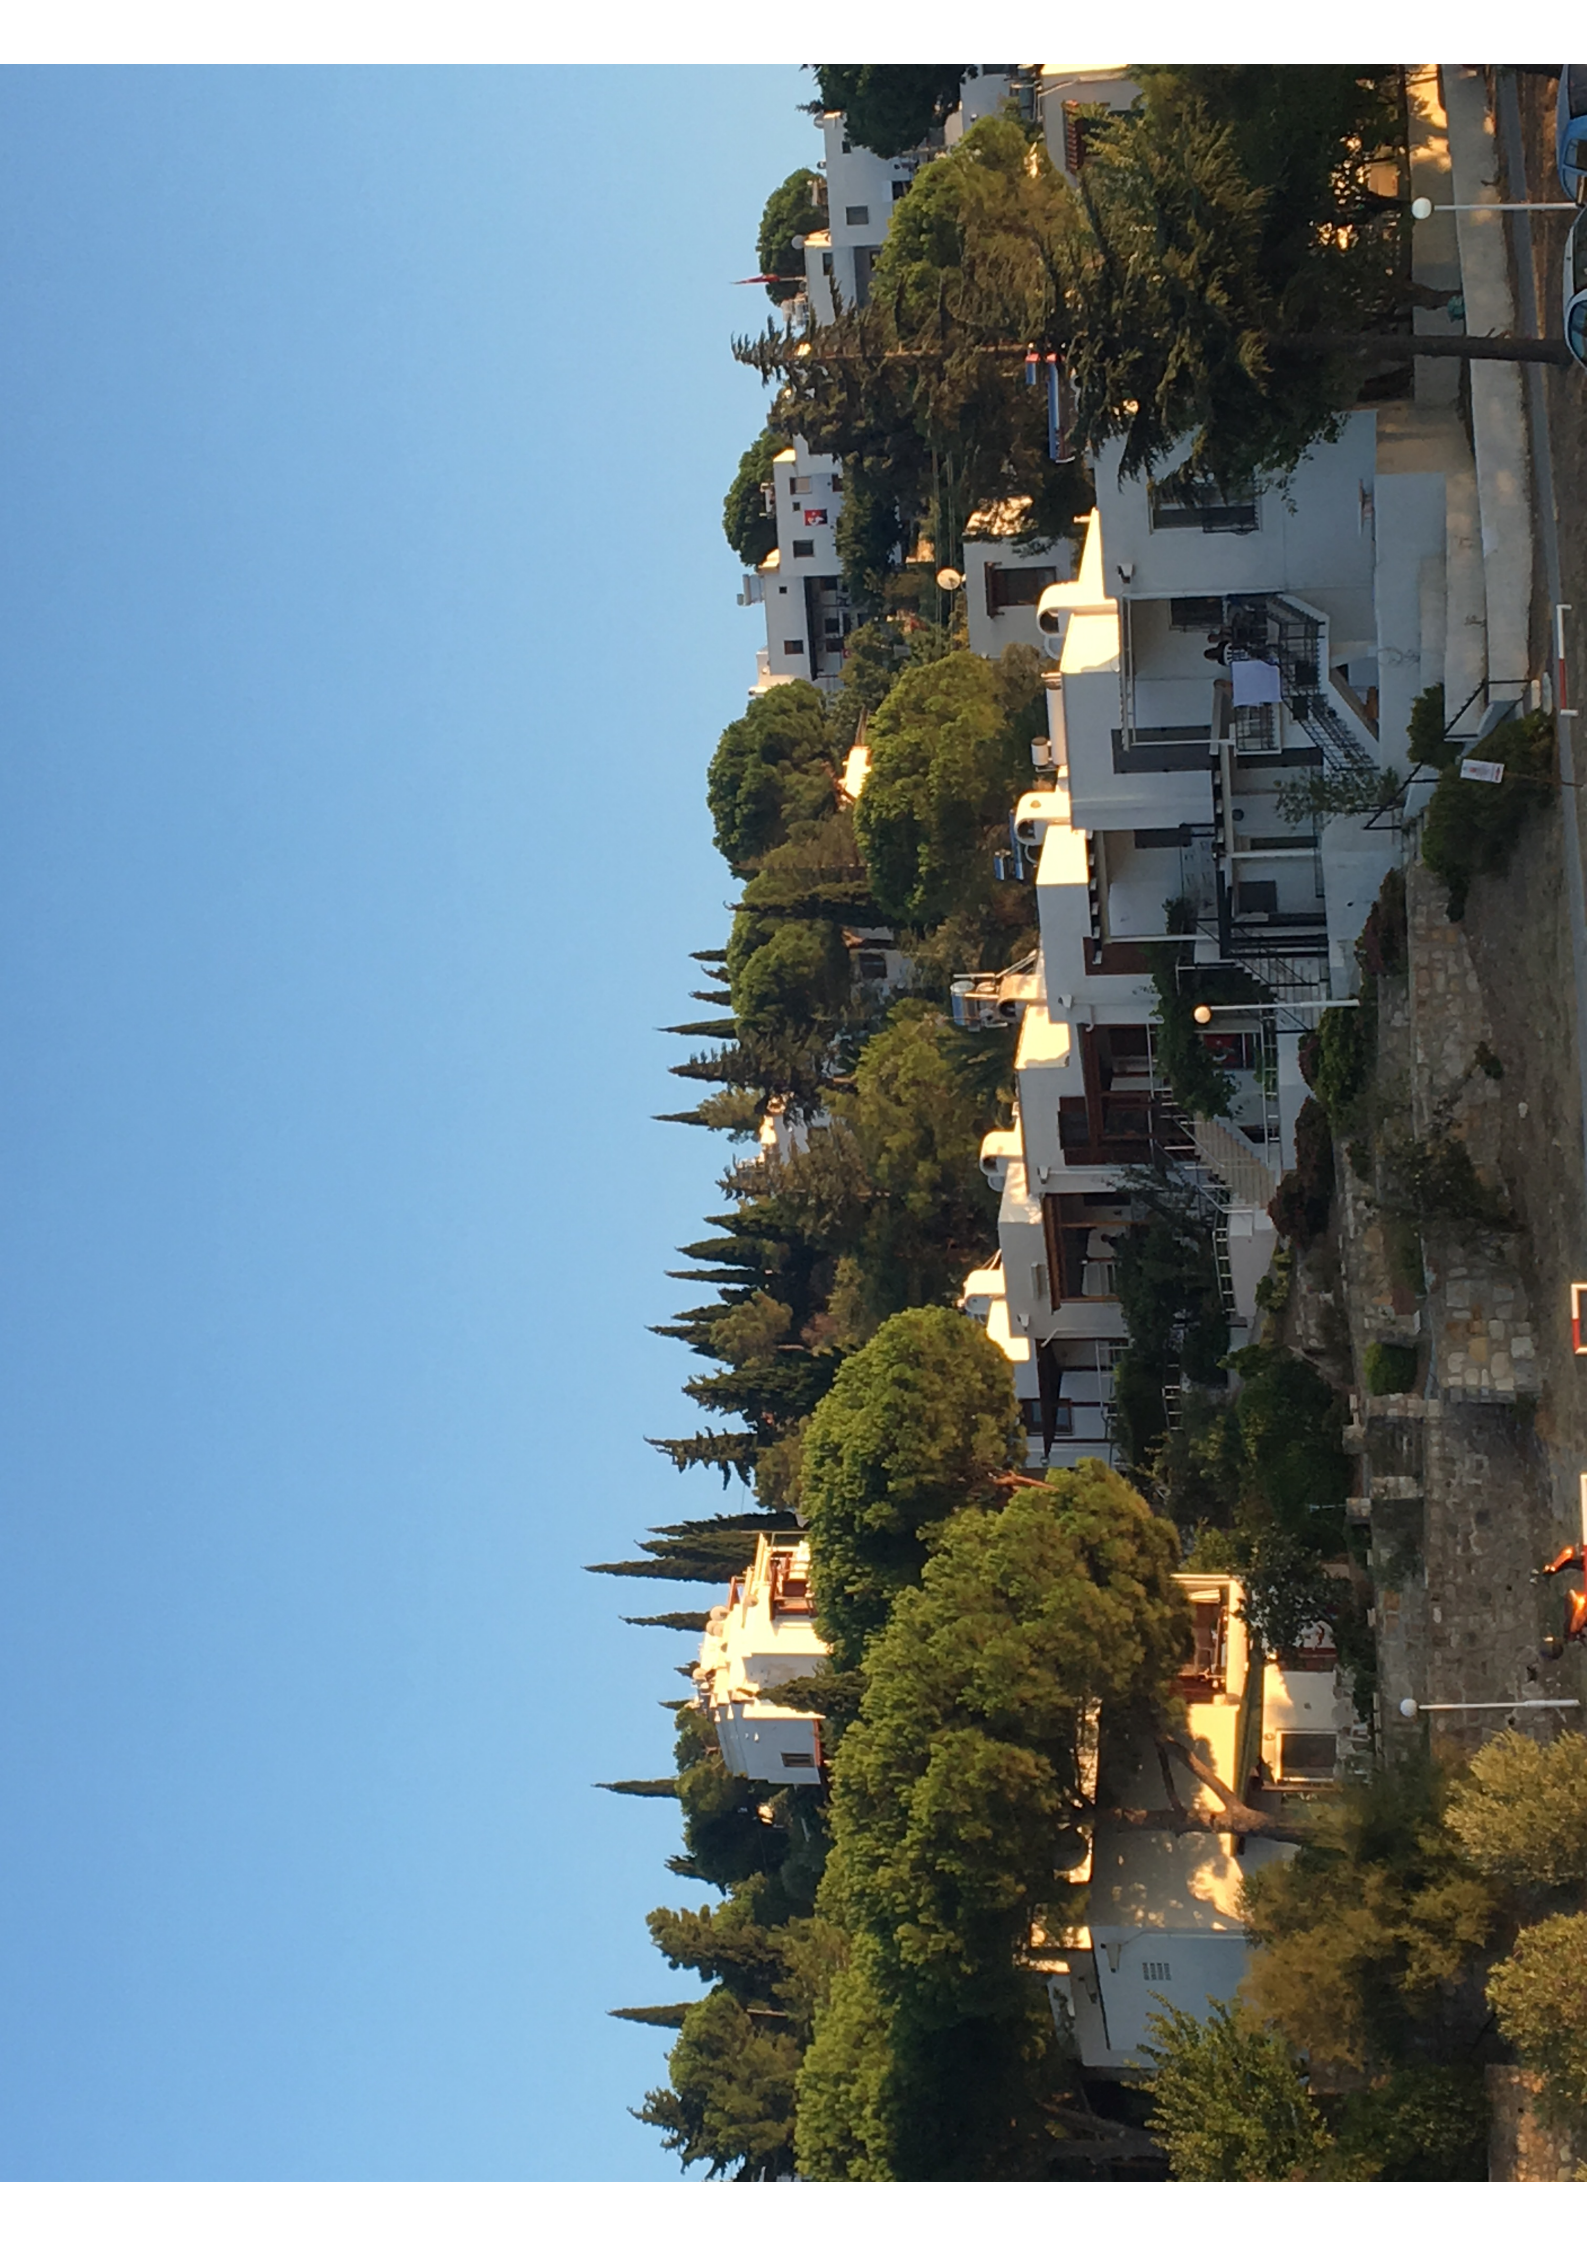

Supplement: Supplementary file 19 [file supplementary]

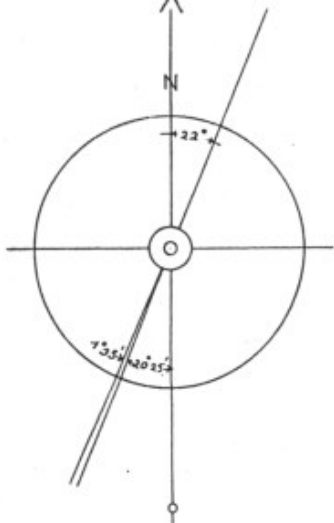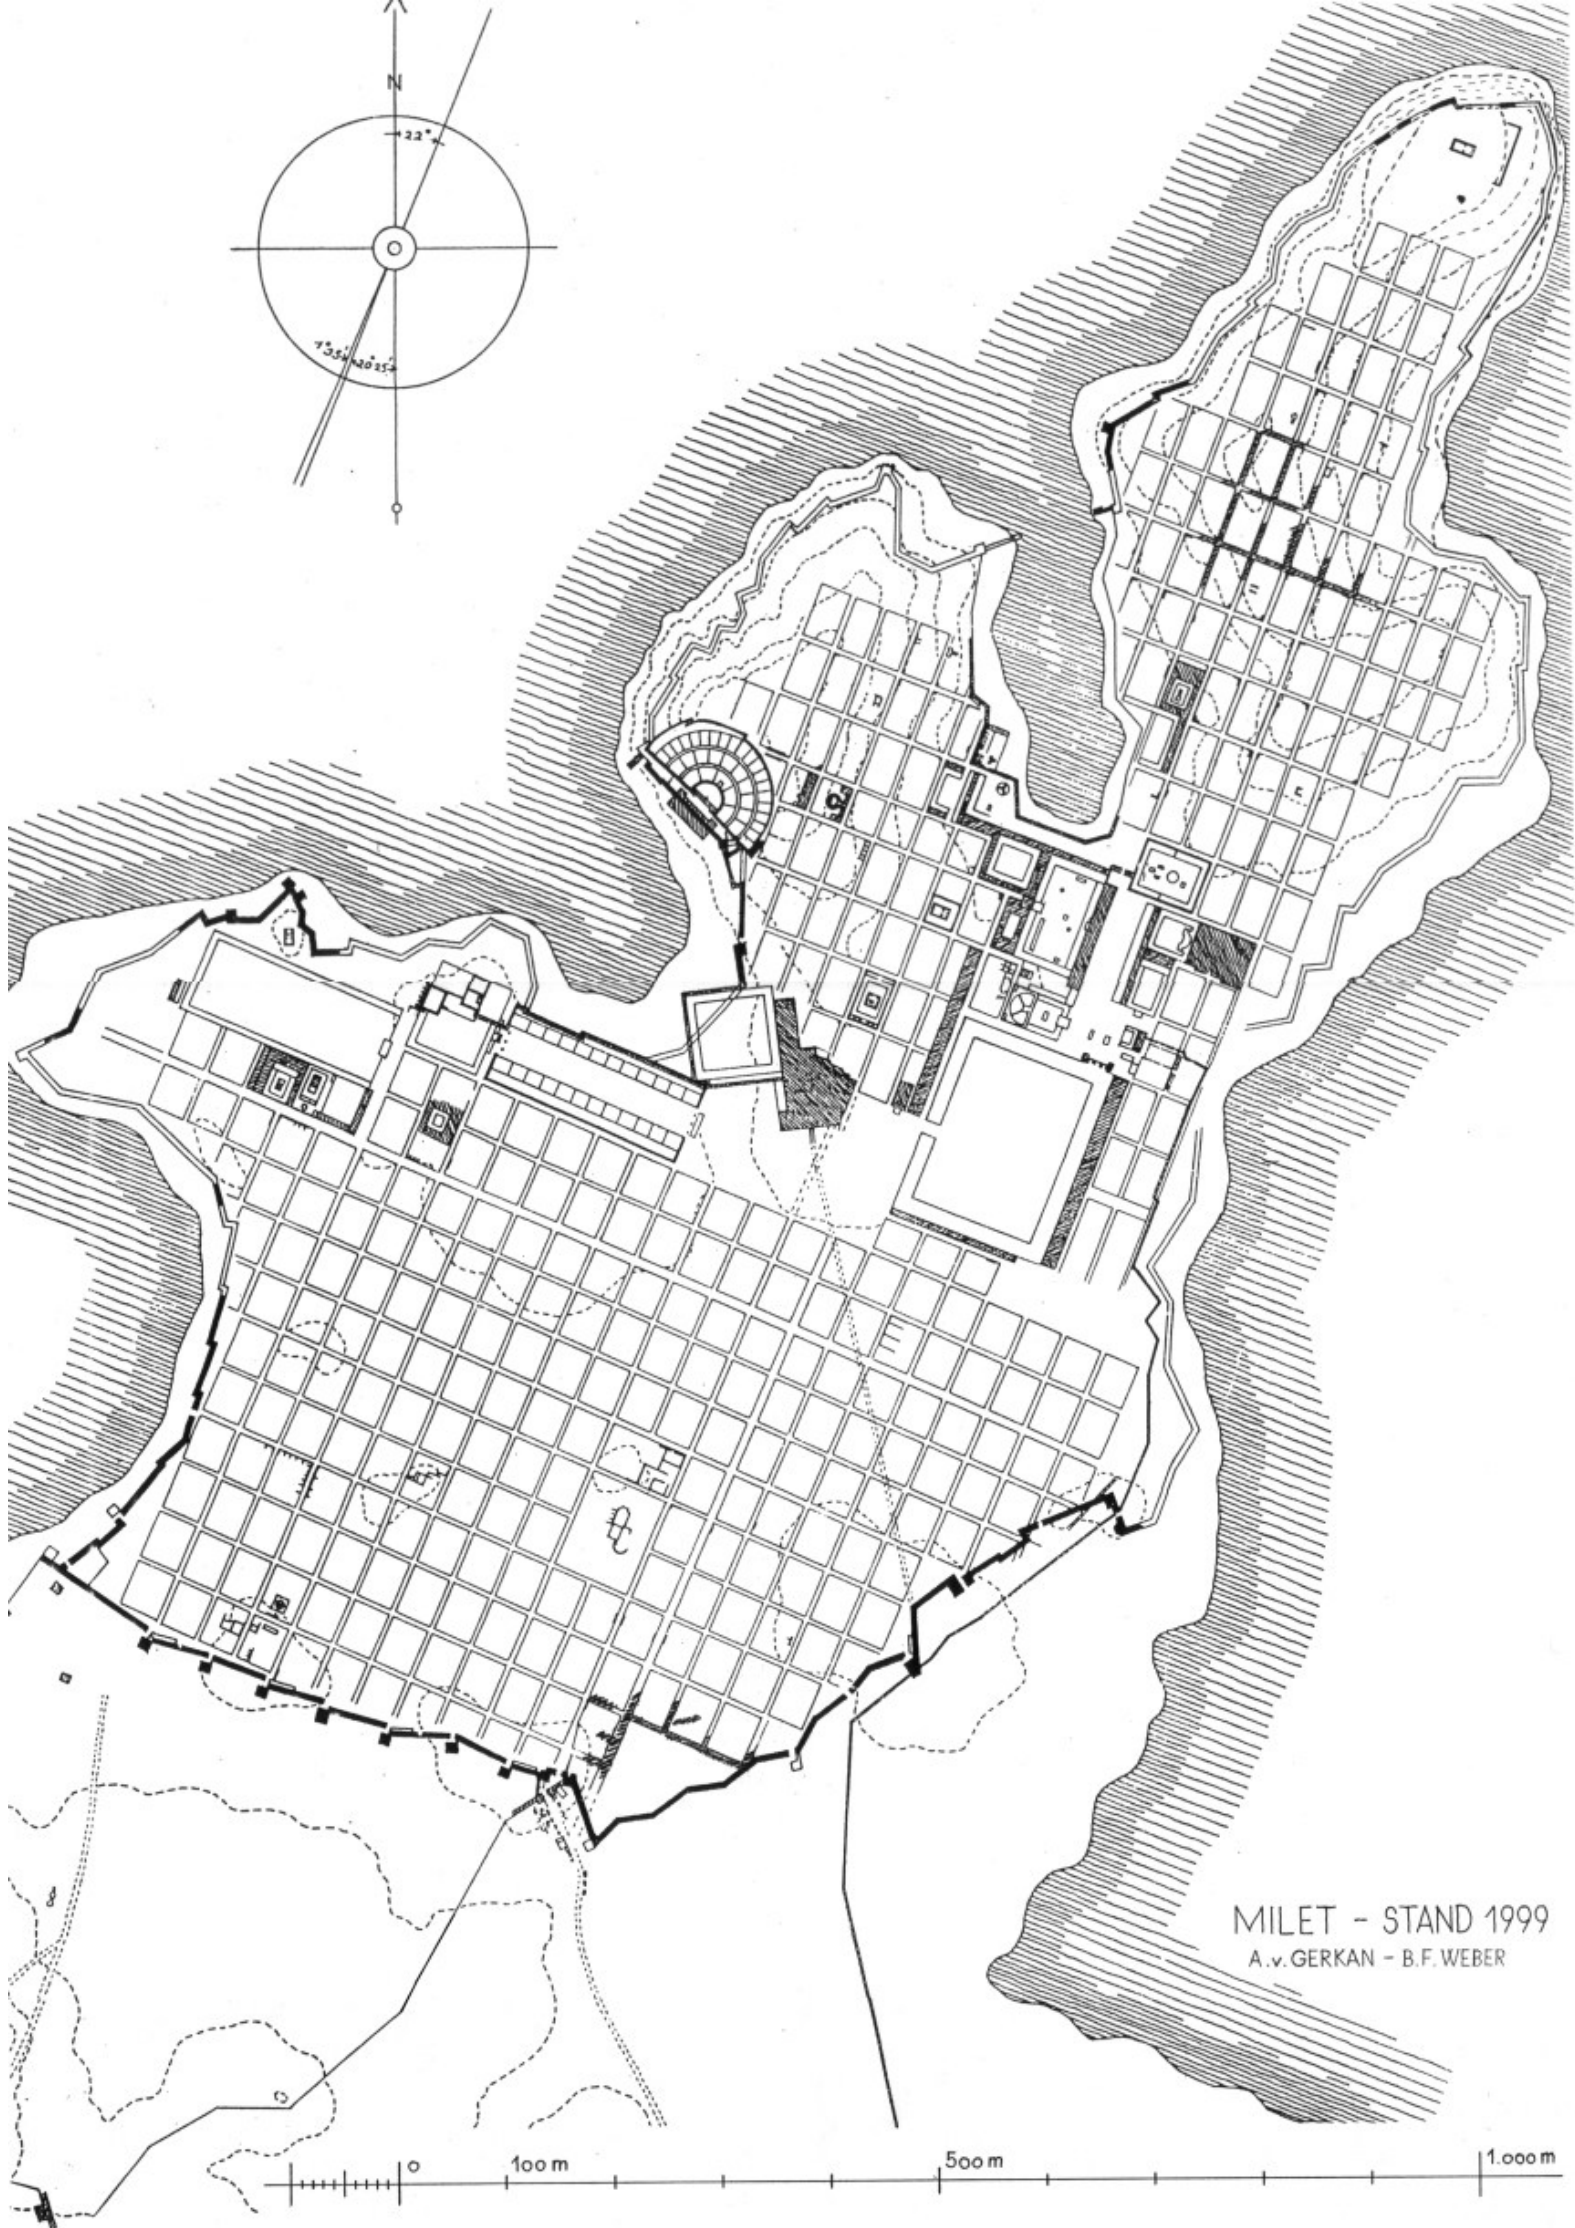

MILET - STAND 1999  
A.v. GERKAN - B.F. WEBER

Supplement: Supplementary file 23 [file supplementary]

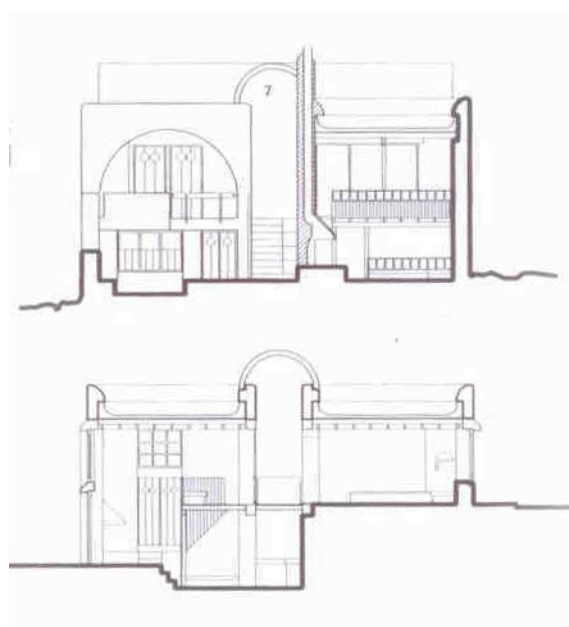

Supplement: Supplementary file 24 [file supplementary]

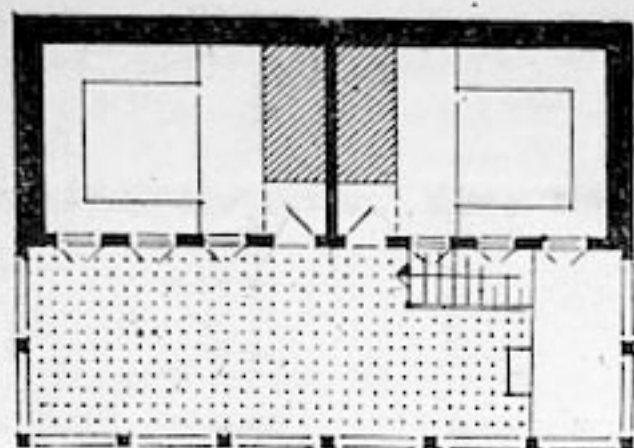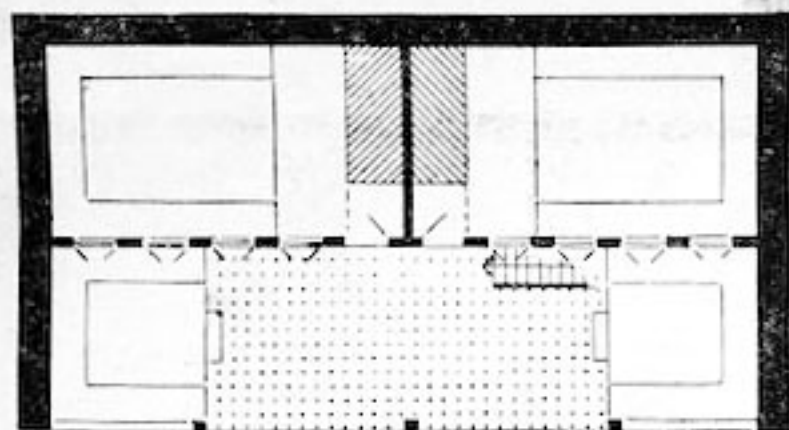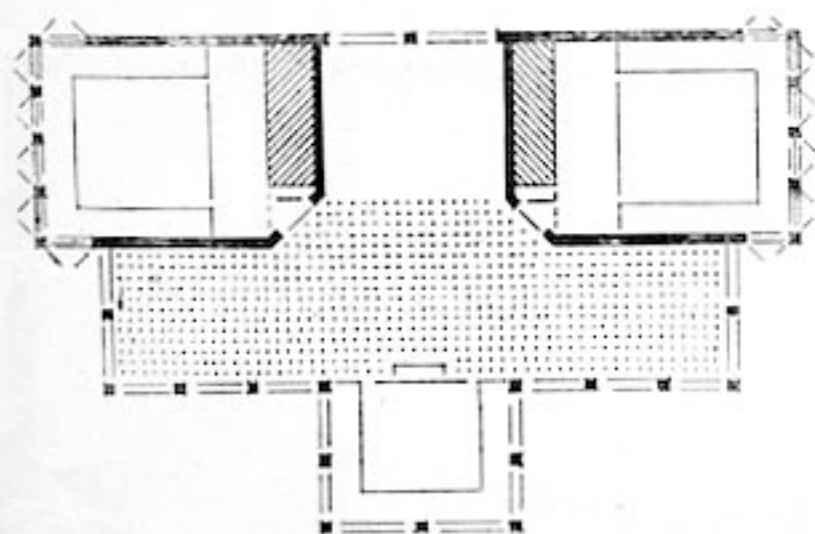

Supplement: Supplementary file 26 [file supplementary]
